# Supplementary material
Source: PubMed Central journal article supplement (PMC4128892)
Supplement: NIHMS593717-supplement-2.pdf [file NIHMS593717-supplement-2.pdf]

## SUPPLEMENTAL MATERIAL

**Supplemental Table 1.** Various times interval according to the status and indication for intubation.

| Time Interval (Minutes)         | Not Intubated |     | Intubated        |     |                   |     |
|---------------------------------|---------------|-----|------------------|-----|-------------------|-----|
|                                 |               |     | Routine Practice |     | Medical Intubated |     |
|                                 | Median (%)    | IQR | Median (%)       | IQR | Median (%)        | IQR |
| Stroke Onset to ED Arrival      | 50 (64.8)     | 34  | 50 (18.2)        | 35  | 50 (17.0)         | 32  |
| ED Arrival to Baseline CT       | 20 (64.6)     | 14  | 19 (18.2)        | 18  | 19 (17.2)         | 15  |
| ED Arrival to Baseline CTA      | 29 (61.9)     | 16  | 29 (21.8)        | 24  | 27 (16.3)         | 18  |
| Baseline CT to CTA              | 6 (61.7)      | 7   | 6 (21.9)         | 7   | 7 (16.4)          | 7   |
| Baseline CTA to IV Bolus        | 31 (61.9)     | 22  | 32 (21.8)        | 26  | 28 (16.3)         | 23  |
| IV Bolus to Randomization       | 25 (64.8)     | 24  | 17 (18.3)        | 23  | 25 (17)           | 24  |
| Randomization to Groin Puncture | 60 (64.2)     | 38  | 66 (18.7)        | 34  | 68 (17.1)         | 41  |
| IV Bolus to Groin Puncture      | 85 (64.1)     | 41  | 83 (18.7)        | 34  | 83 (17.2)         | 55  |
| Groin Puncture to Thrombus ID   | 15 (60.8)     | 15  | 18 (20.4)        | 16  | 15 (18.8)         | 13  |
| Thrombus ID to IA Therapy       | 20 (60.1)     | 26  | 20 (20.5)        | 21  | 22 (19.5)         | 20  |
| IA Start to Reperfusion         | 85 (59.7)     | 74  | 89 (20.7)        | 51  | 85 (19.4)         | 79  |
| IV Bolus to IA Therapy          | 126 (59.8)    | 47  | 126 (20.9)       | 54  | 121 (19.3)        | 45  |
